# Supplementary material for: Effects of Flaxseed Mucilage Admixture on Ordinary Portland Cement Fresh and Hardened States
Source: MDPI journal article supplement (doi:10.3390/app14093862), 2024-04-30
Supplement: s1 [file s1]

## Supplementary materials

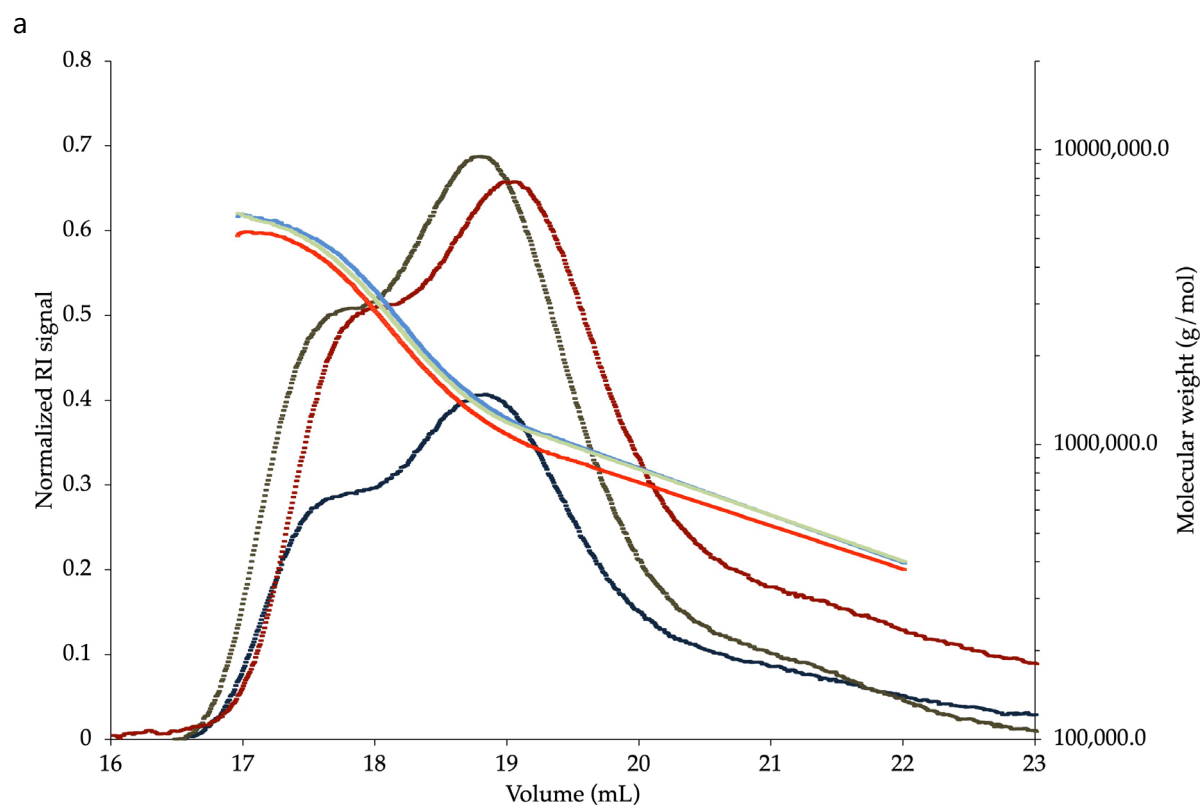

b

| Analysis time | Mn (g/mol)          | Mw (g/mol)          | Polydispersity (Mw/Mn) |
|---------------|---------------------|---------------------|------------------------|
| 0h            | $1.282 \times 10^6$ | $2.126 \times 10^6$ | 1.658                  |
| 48h           | $1.365 \times 10^6$ | $2.175 \times 10^6$ | 1.594                  |
| 72h           | $1.130 \times 10^6$ | $1.912 \times 10^6$ | 1.692                  |

Figure S1. SEC-MALS analysis of flaxseed mucilage ( $1\text{g.l}^{-1}$ ) in NaOH solution (0.04 M) at different analysis times. (a) SEC-Mals profile (0 h: blue, 48 h: green and 72 h: red). Light curves are the molecular weight distribution, dark curves are the Refractive Index signal (RI). (b) SEC-MALS results (Mn: number average molecular weight, Mw: weight-average molecular weight, and polydispersity values (Mw/Mn)).

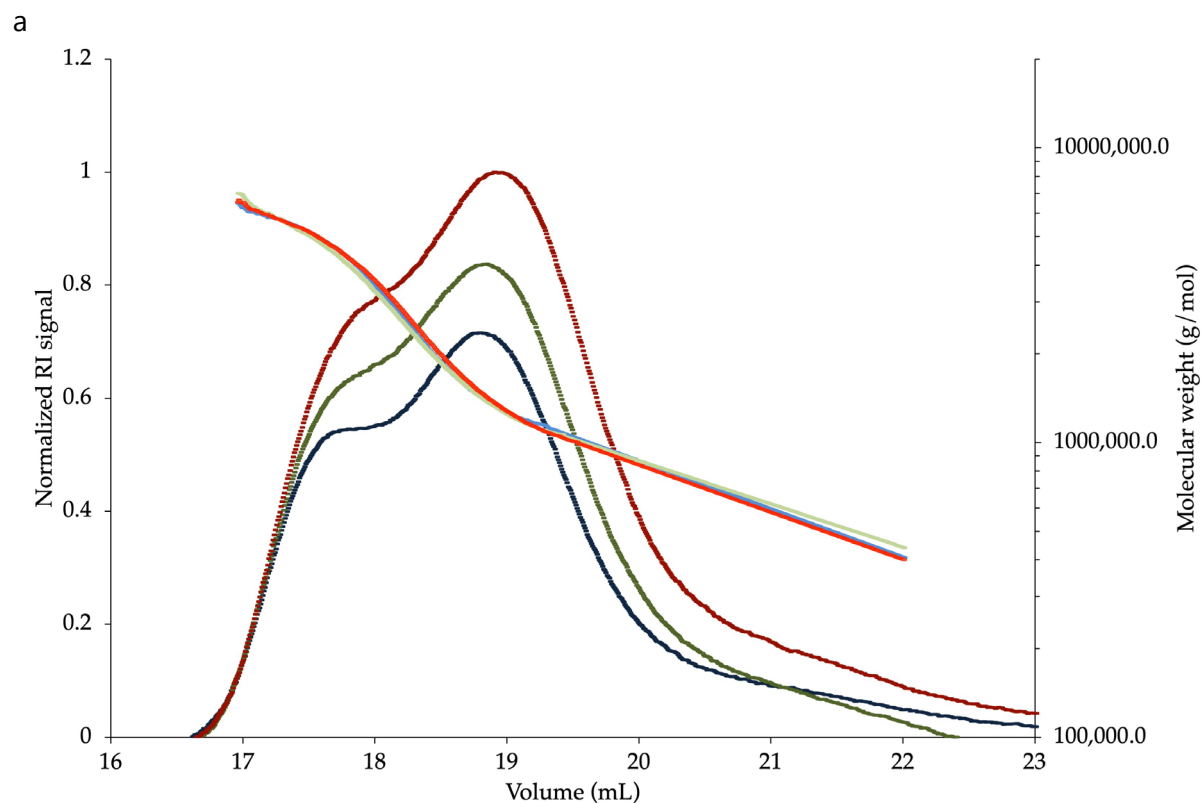

b

| Analysis time | Mn (g/mol)          | Mw (g/mol)          | Polydispersity (Mw/Mn) |
|---------------|---------------------|---------------------|------------------------|
| 0h            | $1.469 \times 10^6$ | $2.334 \times 10^6$ | 1.589                  |
| 48h           | $1.473 \times 10^6$ | $2.246 \times 10^6$ | 1.524                  |
| 72h           | $1.339 \times 10^6$ | $2.157 \times 10^6$ | 1.611                  |

Figure S2. SEC-MALS analysis of flaxseed mucilage ( $1\text{g.l}^{-1}$ ) in  $\text{Ca}(\text{OH})_2$  solution (0.02 M) at different analysis times. (a) SEC-MALS profile (0 h: blue, 48 h: green and 72 h: red). Light curves are the molecular weight distribution, dark curves are the Refractive Index signal (RI). (b) SEC-MALS results (Mn: number average molecular weight, Mw: weight-average molecular weight, and polydispersity values (Mw/Mn)).
